# Supplementary material for: OCTA Derived Vessel Skeleton Density Versus Flux and Their Associations With Systemic Determinants of Health
Source: PubMed Central journal article supplement — Invest Ophthalmol Vis Sci. 2022 Feb 10;63(2):19. doi: 10.1167/iovs.63.2.19 (PMC8842473; doi:10.1167/iovs.63.2.19), 2022-02-10
Supplement: iovs-63-2-19_s001.pdf [file iovs-63-2-19_s001.pdf]

**Supplemental Table 1: Summary of Imaging Variables**

| Variable                        | All              | Sex              |                  | P-Value | Age Group        |                  | P-Value |
|---------------------------------|------------------|------------------|------------------|---------|------------------|------------------|---------|
|                                 |                  | Male             | Female           |         | Age $\geq$ 65    | Age<65           |         |
| VSD<br>Mean (SD)                | 0.148<br>(0.009) | 0.146<br>(0.009) | 0.149<br>(0.008) | 0.07    | 0.146<br>(0.009) | 0.150<br>(0.008) | 0.003   |
| Flux<br>Mean (SD)               | 0.156<br>(0.016) | 0.157<br>(0.014) | 0.156<br>(0.017) | 0.57    | 0.151<br>(0.015) | 0.164<br>(0.015) | <0.001  |
| Axial Length<br>(mm), Mean (SD) | 23.80<br>(1.20)  | 24.05<br>(0.93)  | 23.67<br>(1.30)  | 0.04    | 23.79<br>(0.99)  | 23.81<br>(1.45)  | 0.91    |
| Signal Strength<br>Mean (SD)    | 9.32<br>(0.66)   | 9.29<br>(0.54)   | 9.33<br>(0.72)   | 0.73    | 9.17<br>(0.67)   | 9.55<br>(0.59)   | <0.001  |

\*P-values generated by performing Student's t-tests.

**Supplemental Table 2. Combined Mixed Effect Linear Model Parameters for VSD or Flux Models**

| Model Factor                  | VSD                         |         |                    |                  | Flux                        |         |                    |                  |
|-------------------------------|-----------------------------|---------|--------------------|------------------|-----------------------------|---------|--------------------|------------------|
|                               | Beta* (Std Error) $10^{-3}$ | P Value | Semi-partial $R^2$ | Full Model $R^2$ | Beta* (Std Error) $10^{-3}$ | P Value | Semi-partial $R^2$ | Full Model $R^2$ |
| Signal Strength               | 0.710<br>(1.065)            | 0.51    | 0.004              |                  | 9.879<br>(1.540)            | <0.001  | 0.257              |                  |
| Age, years                    | -0.344<br>(0.103)           | 0.001   | 0.132              |                  | -0.430<br>(0.148)           | 0.005   | 0.102              |                  |
| Systolic blood pressure, mmHg | 0.040<br>(0.038)            | 0.30    | 0.014              | 0.174            | -0.094<br>(0.055)           | 0.09    | 0.037              | 0.509            |
| Diabetes <sup>†</sup>         | 0.297<br>(2.001)            | 0.88    | 0.000              |                  | -5.733<br>(2.878)           | 0.05    | 0.049              |                  |
| Hematocrit, %                 | 0.035<br>(0.194)            | 0.86    | 0.000              |                  | 0.783<br>(0.280)            | 0.006   | 0.098              |                  |
| Retinopathy                   | -4.972<br>(2.014)           | 0.02    | 0.039              |                  | 0.164<br>(2.919)            | 0.96    | 0.000              |                  |

\*Beta values represent the change in the output of interest (VSD or flux) for a single unit increase in the case of continuous variables or by the presence of the characteristic in the case of indicator variables.

<sup>†</sup>Subjects were categorized as diabetic if they endorsed a history of diabetes mellitus or had a Hemoglobin A1c value of 6.5% or greater.
